# Supplementary material
Source: publisher figshare collection journal article supplement (https://acs.figshare.com/ndownloader/files/5191240)
Supplement: Supplementary file 1 [file 5191240]

## Supporting Information

- Figure S1      The SEM/EDS spectra of purified MWNTs and Cp-Fe-MWNTs (after in 1 M HCL aq. solution);
- Figure S2      The gas chromatogram of Cp-Fe-MWNTs, the mass spectrum of its main peak, and the mass spectrum of the physical mixture of MWNTs and ferrocene;
- Figure S3      UV/vis absorption spectrum of PS-functionalized MWNTs in room temperature cyclohexane solution and a Lambert-Beer's law plot at 300 nm;
- Figure S4       $^1\text{H}$  NMR spectra of PS-functionalized MWNTs and the parent polystyrene in deuterated chloroform.

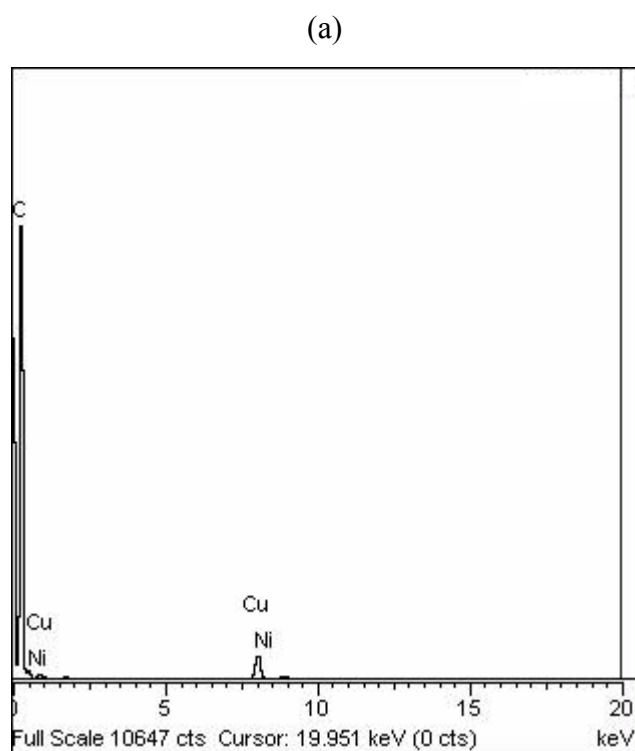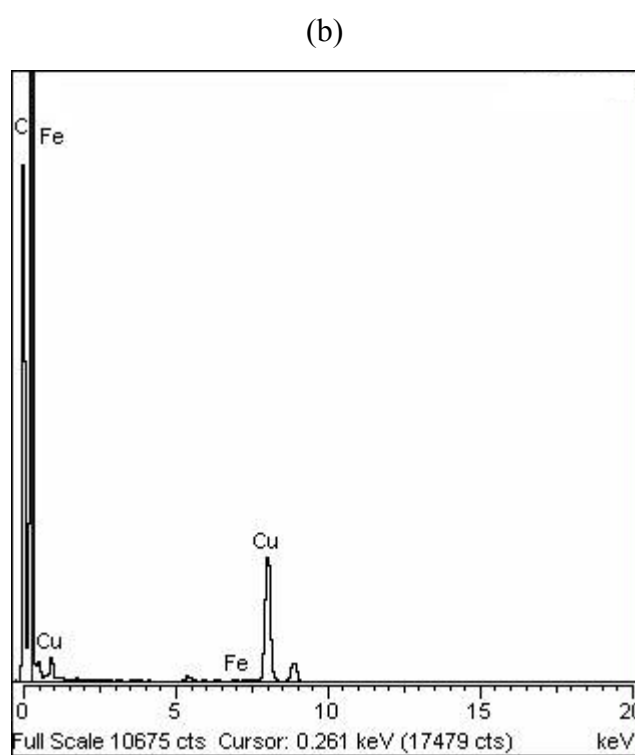

**Figure S1** The SEM/EDS spectrum of (a) purified MWNTs (b) Cp-Fe-MWNTs (after in 1 M HCL aq. solution)

(a)

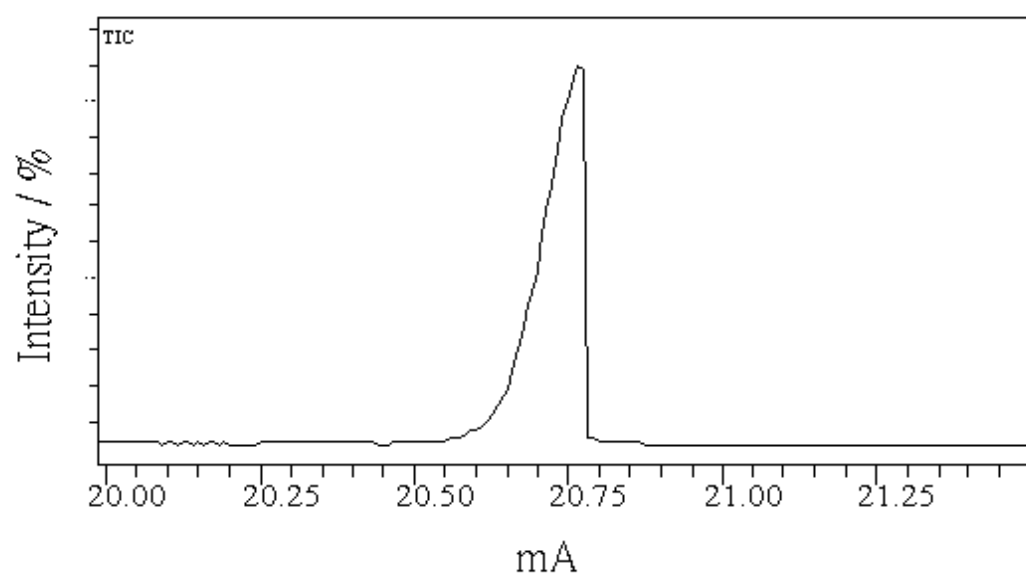

(b)

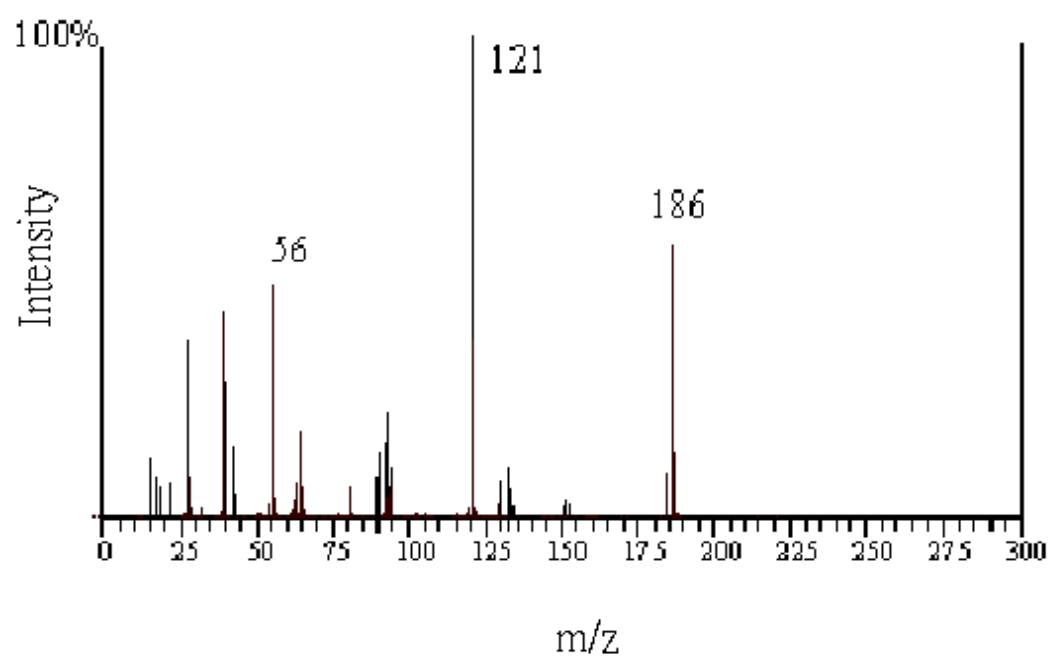

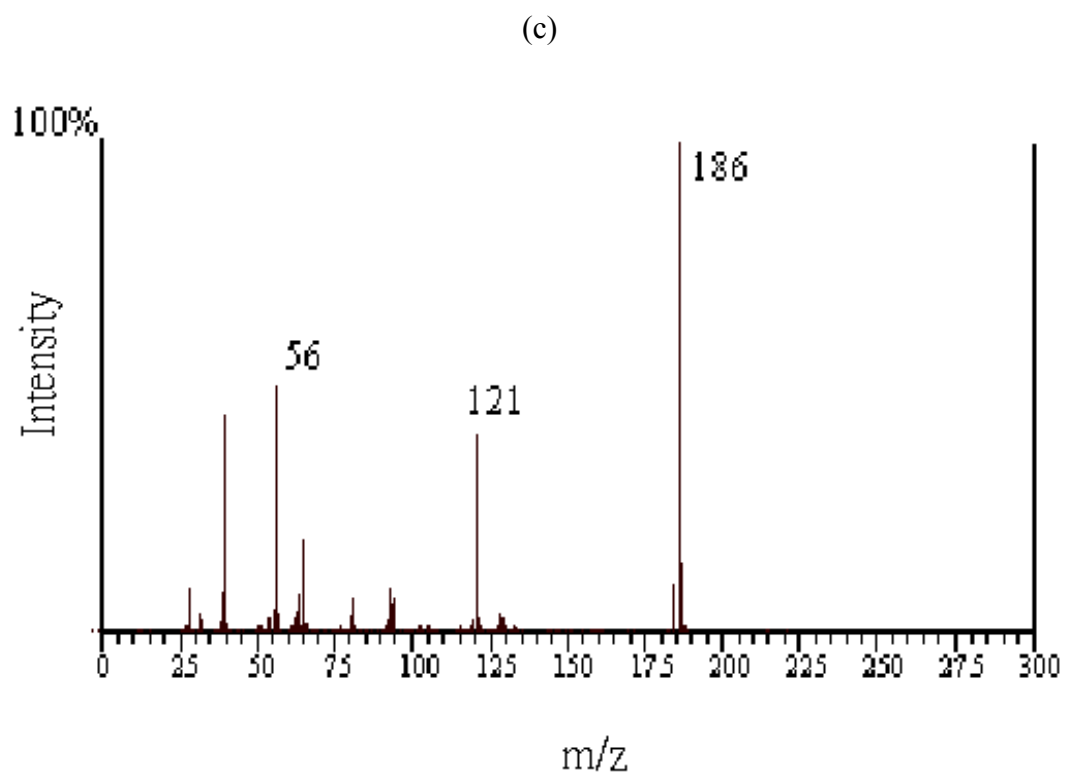

**Figure S2** (a) the gas chromatogram of Cp-Fe-MWNTs (b) mass spectrum of main peak of the chromatogram (c) mass spectrum of the physical mixture of MWNTs and ferrocene.

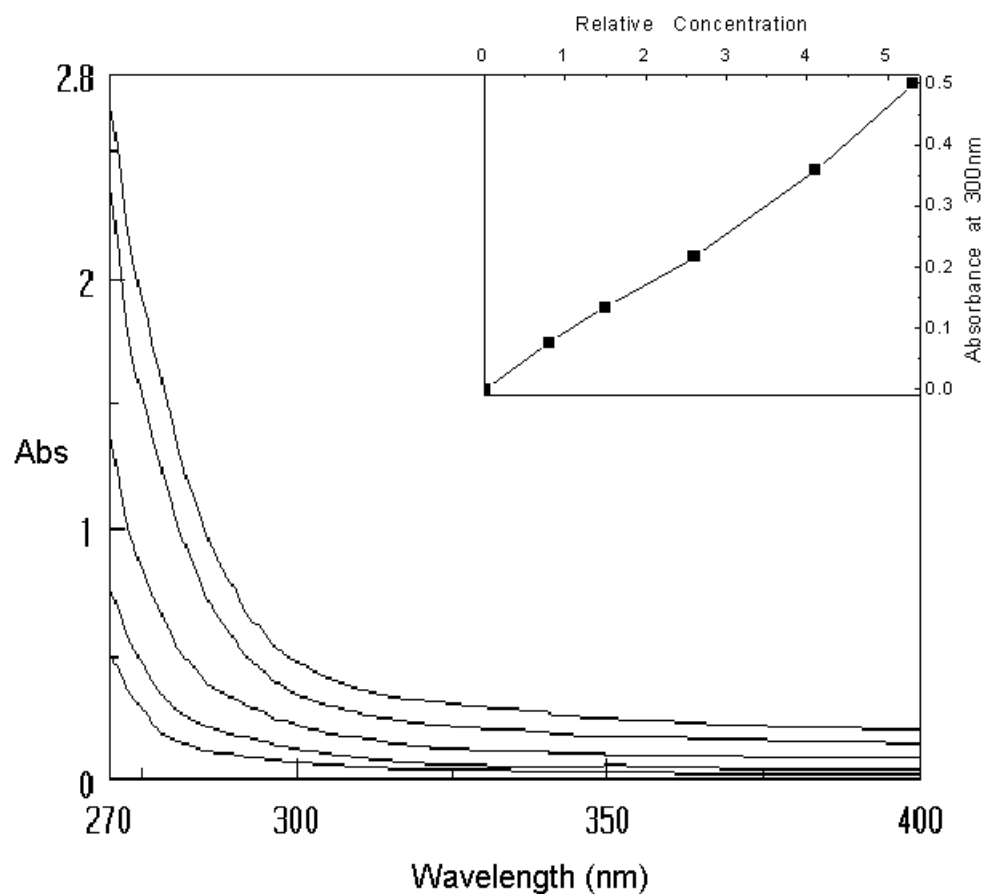

**Figure S3** UV/vis absorption spectra of PS-functionalized MWNTs in room temperature cyclohexane solution. Shown in the inset is a Lambert-Beer's law plot at 300 nm.

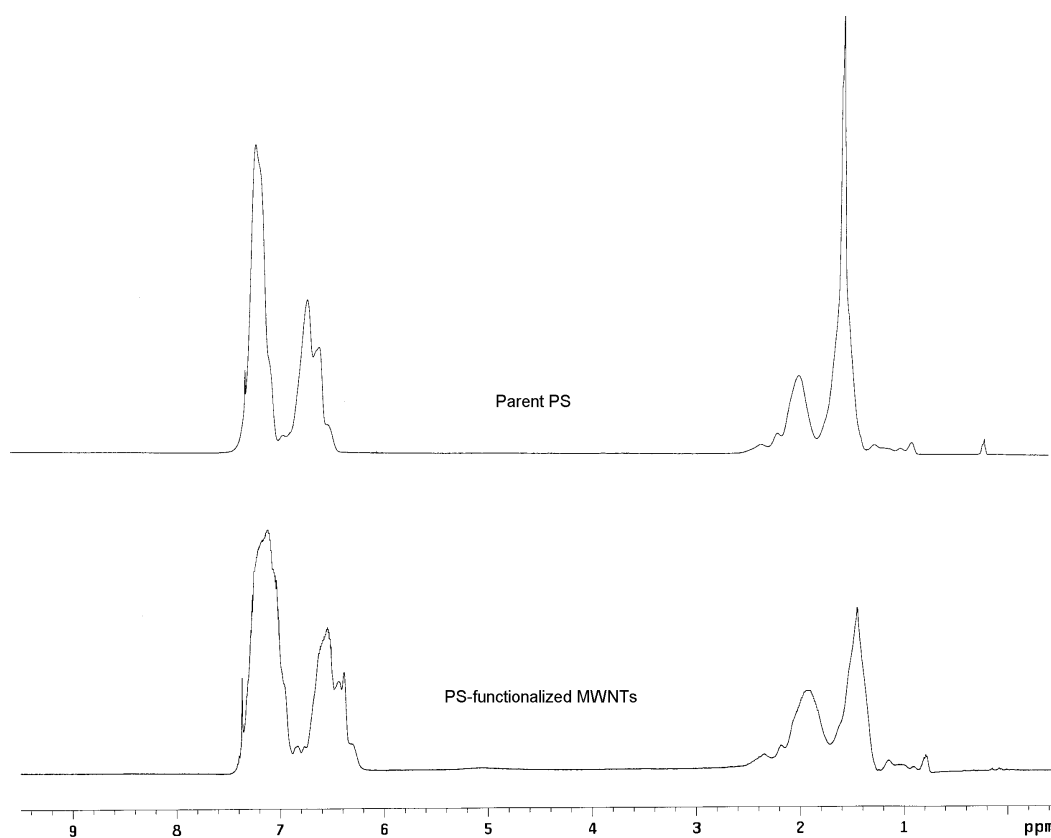

**Figure S4**  $^1\text{H}$  NMR spectrum of PS-functionalized MWNTs is compared with that of the parent PS polymers in deuterated chloroform.
